# Supplementary material
Source: PubMed Central journal article supplement (PMC3934660)
Supplement: Supp_Figure1.pdf [file Supp_Figure1.pdf]

## SUPPLEMENTARY DATA

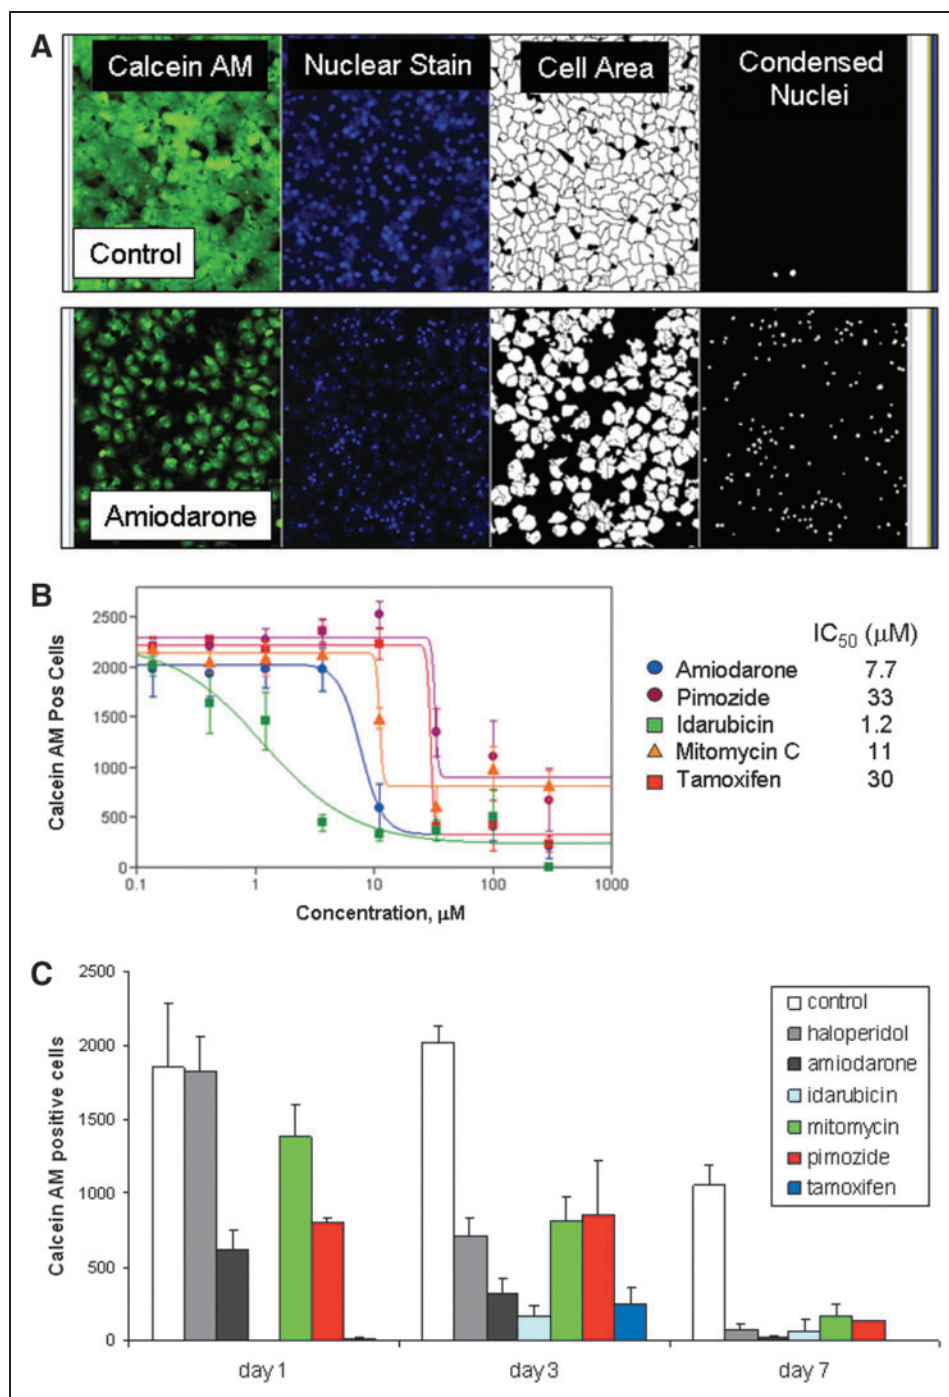

**Supplementary Fig. S1.** Live cell imaging toxicity assessment. **(A)** Multiparametric hepatotoxicity (MPH) analysis. Images and analysis of iCell hepatocytes treated with compounds for 72 h and stained with Calcein AM, Hoechst, and MitoTracker Orange. Images taken with 10× objective and analyzed with Custom Module Editor. Results are shown for untreated (control) and cells treated with 30 μM of amiodarone. **(B)** Concentration-dependent responses for several compounds using number of Calcein AM-positive cells as a read-out. Determined IC<sub>50</sub>s were (in μM): amiodarone, 7.7; pimozide, 33; idarubicin, 1.2; mitomycin C, 11; and tamoxifen, 30. **(C)** Numbers of Calcein AM-positive (viable) cells after treatment with hepatotoxic compounds at different time points: 1, 3, and 7 days of treatment.
