# Supplementary material
Source: PubMed Central journal article supplement (PMC3934660)
Supplement: Supp_Figure3.pdf [file Supp_Figure3.pdf]

A

|                                                           | Name                 | CalceinAM positive cells | Mito Tracker positive cells | Cell count (total cells) | Average granule area per cell (µCm²) | Total granule intensity (IC-10) | Total cell area positive for CalceinAM | Average cell area (CalceinAM) | Average Integrated Intensity (CalceinAM) | Average nuclear area ( Hoechst) | Average nuclear intensity (Hoechst) | Hit 2 para meters |
|-----------------------------------------------------------|----------------------|--------------------------|-----------------------------|--------------------------|--------------------------------------|---------------------------------|----------------------------------------|-------------------------------|------------------------------------------|---------------------------------|-------------------------------------|-------------------|
| DMSO                                                      | Min (Ave-3stdev)     | 699                      | 733                         | 658                      | 80                                   | 86308                           | 671017                                 | 246                           | 1693409                                  | 95                              | 1488                                |                   |
|                                                           | Max (Ave+3stdev)     | 2681                     | 2862                        | 2663                     | 244                                  | 4103008                         | 1602865                                | 1249                          | 102018719                                | 145                             | 1811                                |                   |
|                                                           | Average              | 1790                     | 1848                        | 1656                     | 162                                  | 2483003                         | 1166941                                | 747                           | 6956664                                  | 120                             | 1648                                |                   |
|                                                           | StdDev               | 364                      | 371                         | 399                      | 27                                   | 539990                          | 165300                                 | 167                           | 1397110                                  | 8                               | 54                                  |                   |
|                                                           | Min                  | 20                       | 14                          | 22                       | 17                                   | 22                              | 22                                     | 22                            | 22                                       | 22                              | 22                                  |                   |
|                                                           | Max                  | 2471                     | 2302                        | 2544                     | 172                                  | 2699005                         | 1393185                                | 564                           | 5100709                                  | 100                             | 1662                                | 0 out of 10       |
|                                                           | Lamivudine           | 2607                     | 2377                        | 2677                     | 167                                  | 2648342                         | 1397664                                | 537                           | 5266254                                  | 107                             | 1635                                |                   |
|                                                           | Stavudine            | 2603                     | 2510                        | 2684                     | 166                                  | 2488774                         | 1352329                                | 483                           | 4838715                                  | 103                             | 1603                                |                   |
|                                                           | Zalcitabine          | 2607                     | 2562                        | 3129                     | 159                                  | 2332099                         | 1237930                                | 416                           | 3633396                                  | 90                              | 1702                                |                   |
|                                                           | Zidovudine           | 2601                     | 2433                        | 2682                     | 163                                  | 2430436                         | 1316271                                | 471                           | 3711061                                  | 102                             | 1627                                |                   |
| Nucleoside analog reverse transcriptase inhibitors (NRTI) | Tenofovir            | 2552                     | 2266                        | 2627                     | 170                                  | 2750340                         | 1329510                                | 522                           | 3625443                                  | 105                             | 1679                                |                   |
|                                                           | Trofavir             | 1573                     | 1531                        | 1712                     | 156                                  | 2481046                         | 1163355                                | 732                           | 3488725                                  | 131                             | 1686                                |                   |
|                                                           | Didanosine           | 1663                     | 1590                        | 1700                     | 156                                  | 2329007                         | 1351175                                | 617                           | 4931200                                  | 120                             | 1701                                |                   |
|                                                           | Fluvidine            | 2734                     | 2479                        | 2614                     | 175                                  | 2810030                         | 1377604                                | 504                           | 4622009                                  | 105                             | 1640                                |                   |
|                                                           | Nevirapine           | 1010                     | 1715                        | 1952                     | 152                                  | 2297004                         | 1361605                                | 762                           | 4666823                                  | 110                             | 1684                                |                   |
|                                                           | Ketoconazole         | 99                       | 193                         | 130                      | 121                                  | 1363990                         | 9792                                   | 98                            | 475636                                   | 80                              | 2075                                | 7 out of 8        |
|                                                           | Itraconazole         | 1706                     | 1273                        | 2281                     | 101                                  | 1126160                         | 673612                                 | 336                           | 1070435                                  | 155                             | 3686                                |                   |
|                                                           | Miconazole           | 1104                     | 1002                        | 1199                     | 68                                   | 703463                          | 665290                                 | 793                           | 4012135                                  | 131                             | 1051                                |                   |
|                                                           | Terbinafine HCl      | 98                       | 824                         | 1101                     | 24                                   | 186290                          | 21880                                  | 53                            | 136789                                   | 85                              | 4007                                |                   |
|                                                           | Econazole            | 2774                     | 2187                        | 2978                     | 216                                  | 4594303                         | 1134993                                | 409                           | 2732780                                  | 88                              | 2143                                |                   |
| Anti-fungal                                               | Amphotericin B       | 1530                     | 1496                        | 1592                     | 163                                  | 2227719                         | 1209724                                | 630                           | 4734342                                  | 120                             | 1719                                |                   |
|                                                           | (+)-Griseofulvin     | 1530                     | 1496                        | 1592                     | 163                                  | 2227719                         | 1209724                                | 630                           | 4734342                                  | 120                             | 1719                                |                   |
|                                                           | Troglitazone         | 1567                     | 1520                        | 1626                     | 165                                  | 2670050                         | 1302050                                | 640                           | 4343351                                  | 112                             | 1715                                | 2 out of 3        |
|                                                           | Caglitazone          | 2159                     | 2009                        | 2218                     | 165                                  | 2670950                         | 1302050                                | 640                           | 4343351                                  | 113                             | 1751                                |                   |
|                                                           | Ezetimibe            | 1487                     | 1414                        | 1538                     | 149                                  | 2227413                         | 1228413                                | 598                           | 4664000                                  | 130                             | 1690                                | 7 out of 11       |
|                                                           | Niacin               | 1487                     | 1414                        | 1538                     | 149                                  | 2227413                         | 1228413                                | 598                           | 4664000                                  | 130                             | 1690                                |                   |
|                                                           | Simvastatin          | 1487                     | 1414                        | 1538                     | 149                                  | 2227413                         | 1228413                                | 598                           | 4664000                                  | 130                             | 1690                                |                   |
|                                                           | Lovastatin           | 1487                     | 1414                        | 1538                     | 149                                  | 2227413                         | 1228413                                | 598                           | 4664000                                  | 130                             | 1690                                |                   |
|                                                           | Atorvastatin         | 1487                     | 1414                        | 1538                     | 149                                  | 2227413                         | 1228413                                | 598                           | 4664000                                  | 130                             | 1690                                |                   |
|                                                           | Rosuvastatin         | 1487                     | 1414                        | 1538                     | 149                                  | 2227413                         | 1228413                                | 598                           | 4664000                                  | 130                             | 1690                                |                   |
| Statins, cholesterol-lowering drugs                       | Pravastatin          | 2329                     | 2169                        | 2421                     | 171                                  | 2811206                         | 1404711                                | 629                           | 3645690                                  | 106                             | 1570                                |                   |
|                                                           | Ciprofibrate         | 1487                     | 1414                        | 1538                     | 149                                  | 2227413                         | 1228413                                | 598                           | 4664000                                  | 130                             | 1690                                |                   |
|                                                           | Clofibrate           | 1469                     | 1165                        | 2660                     | 80                                   | 1037450                         | 278622                                 | 173                           | 607181                                   | 90                              | 1701                                |                   |
|                                                           | Fenofibrate          | 2649                     | 1997                        | 2954                     | 152                                  | 2489298                         | 1017700                                | 360                           | 2196841                                  | 90                              | 2625                                |                   |
|                                                           | Orlistat             | 1305                     | 1237                        | 1355                     | 126                                  | 2487072                         | 1166570                                | 600                           | 3619677                                  | 141                             | 1698                                |                   |
|                                                           | Atorvastatin G1      | 1487                     | 1414                        | 1538                     | 149                                  | 2227413                         | 1228413                                | 598                           | 4664000                                  | 130                             | 1690                                | 12 out of 13      |
|                                                           | Atorvastatin G2      | 1487                     | 1414                        | 1538                     | 149                                  | 2227413                         | 1228413                                | 598                           | 4664000                                  | 130                             | 1690                                |                   |
|                                                           | Atorvastatin G3      | 1487                     | 1414                        | 1538                     | 149                                  | 2227413                         | 1228413                                | 598                           | 4664000                                  | 130                             | 1690                                |                   |
|                                                           | Atorvastatin G4      | 1487                     | 1414                        | 1538                     | 149                                  | 2227413                         | 1228413                                | 598                           | 4664000                                  | 130                             | 1690                                |                   |
|                                                           | Atorvastatin G5      | 1487                     | 1414                        | 1538                     | 149                                  | 2227413                         | 1228413                                | 598                           | 4664000                                  | 130                             | 1690                                |                   |
| Known toxins                                              | Zinc                 | 1487                     | 1414                        | 1538                     | 149                                  | 2227413                         | 1228413                                | 598                           | 4664000                                  | 130                             | 1690                                |                   |
|                                                           | Cadmium              | 1487                     | 1414                        | 1538                     | 149                                  | 2227413                         | 1228413                                | 598                           | 4664000                                  | 130                             | 1690                                |                   |
|                                                           | Mercury              | 1487                     | 1414                        | 1538                     | 149                                  | 2227413                         | 1228413                                | 598                           | 4664000                                  | 130                             | 1690                                |                   |
|                                                           | Lead                 | 1487                     | 1414                        | 1538                     | 149                                  | 2227413                         | 1228413                                | 598                           | 4664000                                  | 130                             | 1690                                |                   |
|                                                           | Chromium             | 1487                     | 1414                        | 1538                     | 149                                  | 2227413                         | 1228413                                | 598                           | 4664000                                  | 130                             | 1690                                |                   |
|                                                           | Copper               | 1487                     | 1414                        | 1538                     | 149                                  | 2227413                         | 1228413                                | 598                           | 4664000                                  | 130                             | 1690                                |                   |
|                                                           | Iron                 | 1487                     | 1414                        | 1538                     | 149                                  | 2227413                         | 1228413                                | 598                           | 4664000                                  | 130                             | 1690                                |                   |
|                                                           | Manganese            | 1487                     | 1414                        | 1538                     | 149                                  | 2227413                         | 1228413                                | 598                           | 4664000                                  | 130                             | 1690                                |                   |
|                                                           | Nickel               | 1487                     | 1414                        | 1538                     | 149                                  | 2227413                         | 1228413                                | 598                           | 4664000                                  | 130                             | 1690                                |                   |
|                                                           | Selenium             | 1487                     | 1414                        | 1538                     | 149                                  | 2227413                         | 1228413                                | 598                           | 4664000                                  | 130                             | 1690                                |                   |
| Anti-inflammatory                                         | Aspirin              | 1487                     | 1414                        | 1538                     | 149                                  | 2227413                         | 1228413                                | 598                           | 4664000                                  | 130                             | 1690                                |                   |
|                                                           | Ibuprofen            | 1487                     | 1414                        | 1538                     | 149                                  | 2227413                         | 1228413                                | 598                           | 4664000                                  | 130                             | 1690                                |                   |
|                                                           | Naproxen             | 1487                     | 1414                        | 1538                     | 149                                  | 2227413                         | 1228413                                | 598                           | 4664000                                  | 130                             | 1690                                |                   |
|                                                           | Acetaminophen        | 1487                     | 1414                        | 1538                     | 149                                  | 2227413                         | 1228413                                | 598                           | 4664000                                  | 130                             | 1690                                |                   |
|                                                           | Acetylsalicylic acid | 1487                     | 1414                        | 1538                     | 149                                  | 2227413                         | 1228413                                | 598                           | 4664000                                  | 130                             | 1690                                |                   |
|                                                           | Cyclopentolol        | 1487                     | 1414                        | 1538                     | 149                                  | 2227413                         | 1228413                                | 598                           | 4664000                                  | 130                             | 1690                                |                   |
|                                                           | Carbamazepine        | 1487                     | 1414                        | 1538                     | 149                                  | 2227413                         | 1228413                                | 598                           | 4664000                                  | 130                             | 1690                                |                   |
|                                                           | Phenytoin            | 1487                     | 1414                        | 1538                     | 149                                  | 2227413                         | 1228413                                | 598                           | 4664000                                  | 130                             | 1690                                |                   |
|                                                           | Valproic acid        | 1487                     | 1414                        | 1538                     | 149                                  | 2227413                         | 1228413                                | 598                           | 4664000                                  | 130                             | 1690                                |                   |
|                                                           | Topiramate           | 1487                     | 1414                        | 1538                     | 149                                  | 2227413                         | 1228413                                | 598                           | 4664000                                  | 130                             | 1690                                |                   |
| Anti-ischemic                                             | Aspirin              | 1487                     | 1414                        | 1538                     | 149                                  | 2227413                         | 1228413                                | 598                           | 4664000                                  | 130                             | 1690                                |                   |
|                                                           | Ibuprofen            | 1487                     | 1414                        | 1538                     | 149                                  | 2227413                         | 1228413                                | 598                           | 4664000                                  | 130                             | 1690                                |                   |
|                                                           | Naproxen             | 1487                     | 1414                        | 1538                     | 149                                  | 2227413                         | 1228413                                | 598                           | 4664000                                  | 130                             | 1690                                |                   |
|                                                           | Acetaminophen        | 1487                     | 1414                        | 1538                     | 149                                  | 2227413                         | 1228413                                | 598                           | 4664000                                  | 130                             | 1690                                |                   |
|                                                           | Acetylsalicylic acid | 1487                     | 1414                        | 1538                     | 149                                  | 2227413                         | 1228413                                | 598                           | 4664000                                  | 130                             | 1690                                |                   |
|                                                           | Cyclopentolol        | 1487                     | 1414                        | 1538                     | 149                                  | 2227413                         | 1228413                                | 598                           | 4664000                                  | 130                             | 1690                                |                   |
|                                                           | Carbamazepine        | 1487                     | 1414                        | 1538                     | 149                                  | 2227413                         | 1228413                                | 598                           | 4664000                                  | 130                             | 1690                                |                   |
|                                                           | Phenytoin            | 1487                     | 1414                        | 1538                     | 149                                  | 2227413                         | 1228413                                | 598                           | 4664000                                  | 130                             | 1690                                |                   |
|                                                           | Valproic acid        | 1487                     | 1414                        | 1538                     | 149                                  | 2227413                         | 1228413                                | 598                           | 4664000                                  | 130                             | 1690                                |                   |
|                                                           | Topiramate           | 1487                     | 1414                        | 1538                     | 149                                  | 2227413                         | 1228413                                | 598                           | 4664000                                  | 130                             | 1690                                |                   |
| Cardiac drugs                                             | Aspirin              | 1487                     | 1414                        | 1538                     | 149                                  | 2227413                         | 1228413                                | 598                           | 4664000                                  | 130                             | 1690                                |                   |
|                                                           | Ibuprofen            | 1487                     | 1414                        | 1538                     | 149                                  | 2227413                         | 1228413                                | 598                           | 4664000                                  | 130                             | 1690                                |                   |
|                                                           | Naproxen             | 1487                     | 1414                        | 1538                     | 149                                  | 2227413                         | 1228413                                | 598                           | 4664000                                  | 130                             | 1690                                |                   |
|                                                           | Acetaminophen        | 1487                     | 1414                        | 1538                     | 149                                  | 2227413                         | 1228413                                | 598                           | 4664000                                  | 130                             | 1690                                |                   |
|                                                           | Acetylsalicylic acid | 1487                     | 1414                        | 1538                     | 149                                  | 2227413                         | 1228413                                | 598                           | 4664000                                  | 130                             | 1690                                |                   |
|                                                           | Cyclopentolol        | 1487                     | 1414                        | 1538                     | 149                                  | 2227413                         | 1228413                                | 598                           | 4664000                                  | 130                             | 1690                                |                   |
|                                                           | Carbamazepine        | 1487                     | 1414                        | 1538                     | 149                                  | 2227413                         | 1228413                                | 598                           | 4664000                                  | 130                             | 1690                                |                   |
|                                                           | Phenytoin            | 1487                     | 1414                        | 1538                     | 149                                  | 2227413                         | 1228413                                | 598                           | 4664000                                  | 130                             | 1690                                |                   |
|                                                           | Valproic acid        | 1487                     | 1414                        | 1538                     | 149                                  | 2227413                         | 1228413                                | 598                           | 4664000                                  | 130                             | 1690                                |                   |
|                                                           | Topiramate           | 1487                     | 1414                        | 1538                     | 149                                  | 2227413                         | 1228413                                | 598                           | 4664000                                  | 130                             | 1690                                |                   |
| Anti-cancer                                               | Aspirin              | 1487                     | 1414                        | 1538                     | 149                                  | 2227413                         | 1228413                                | 598                           | 4664000                                  | 130                             | 1690                                |                   |
|                                                           | Ibuprofen            | 1487                     | 1414                        | 1538                     | 149                                  | 2227413                         | 1228413                                | 598                           | 4664000                                  | 130                             | 1690                                |                   |
|                                                           | Naproxen             | 1487                     | 1414                        | 1538                     | 149                                  | 2227413                         | 1228413                                | 598                           | 4664000                                  | 130                             | 1690                                |                   |
|                                                           | Acetaminophen        | 1487                     | 1414                        | 1538                     | 149                                  | 2227413                         | 1228413                                | 598                           | 4664000                                  | 130                             | 1690                                |                   |
|                                                           | Acetylsalicylic acid | 1487                     | 1414                        | 1538                     | 149                                  | 2227413                         | 1228413                                | 598                           | 4664000                                  | 130                             | 1690                                |                   |
|                                                           | Cyclopentolol        | 1487                     | 1414                        | 1538                     | 149                                  | 2227413                         | 1228413                                | 598                           | 4664000                                  | 130                             | 1690                                |                   |
|                                                           | Carbamazepine        | 1487                     | 1414                        | 1538                     | 149                                  | 2227413                         | 1228413                                | 598                           | 4664000                                  | 130                             | 1690                                |                   |
|                                                           | Phenytoin            | 1487                     | 1414                        | 1538                     | 149                                  | 2227413                         | 1228413                                | 598                           | 4664000                                  | 130                             | 1690                                |                   |
|                                                           | Valproic acid        | 1487                     | 1414                        | 1538                     | 149                                  | 2227413                         | 1228413                                | 598                           | 4664000                                  | 130                             | 1690                                |                   |
|                                                           | Topiramate           | 1487                     | 1414                        | 1538                     | 149                                  | 2227413                         | 1228413                                | 598                           | 4664000                                  | 130                             | 1690                                |                   |
| Neuroleptics                                              | Aspirin              | 1487                     | 1414                        | 1538                     | 149                                  | 2227413                         | 1228413                                | 598                           | 4664000                                  | 130                             | 1690                                |                   |
|                                                           | Ibuprofen            | 1487                     | 1414                        | 1538                     | 149                                  | 2227413                         | 1228413                                | 598                           | 4664000                                  | 130                             | 1690                                |                   |
|                                                           | Naproxen             | 1487                     | 1414                        | 1538                     | 149                                  | 2227413                         | 1228413                                | 598                           | 4664000                                  | 130                             | 1690                                |                   |
|                                                           | Acetaminophen        | 1487                     | 1414                        | 1538                     | 149                                  | 2227413                         | 1228413                                | 598                           | 4664000                                  | 130                             | 1690                                |                   |
|                                                           | Acetylsalicylic acid | 1487                     | 1414                        | 1538                     | 149                                  | 2227413                         | 1228413                                | 598                           | 4664000                                  | 130                             | 1690                                |                   |
|                                                           | Cyclopentolol        | 1487                     | 1414                        | 1538                     | 149                                  | 2227413                         | 1228413                                | 598                           | 4664000                                  | 130                             | 1690                                |                   |

B

|                        | Name                    | CalceinAM positive cells | Mito Tracker positive cells | Cell count (total cells) | Average granule area per cell (JC10) | Total granule intensity (JC-10) | Total cell area positive for CalceinAM | Average cell area (CalceinAM) | Average integrated intensity (CalceinAM) | Average nuclear area (Hoechst) | Average nuclear intensity (Hoechst) | Hits 2 parameters |
|------------------------|-------------------------|--------------------------|-----------------------------|--------------------------|--------------------------------------|---------------------------------|----------------------------------------|-------------------------------|------------------------------------------|--------------------------------|-------------------------------------|-------------------|
| Antibiotics            | Gentamicin D            | 1867                     | 1809                        | 1899                     | 166                                  | 2584616                         | 1425988                                | 766                           | 5493806                                  | 124                            | 1677                                | 13 out of 24      |
|                        | Chloramphenicol         | 2140                     | 2033                        | 2186                     | 157                                  | 2253029                         | 1393856                                | 660                           | 5607095                                  | 120                            | 1660                                |                   |
|                        | Chloroquine             | 2012                     | 1875                        | 2065                     | 174                                  | 2515552                         | 1251058                                | 627                           | 4019862                                  | 84                             | 2656                                |                   |
|                        | Rifampicin              | 510                      | 757                         | 1096                     | 92                                   | 1155917                         | 36199                                  | 75                            | 136308                                   | 143                            | 1340                                |                   |
|                        | Ceftazidime             | 2522                     | 2113                        | 2639                     | 146                                  | 2479879                         | 1201459                                | 479                           | 2669316                                  | 85                             | 1381                                |                   |
|                        | Doxycycline             | 1169                     | 824                         | 1439                     | 47                                   | 354910                          | 173561                                 | 149                           | 788202                                   | 110                            | 1696                                |                   |
|                        | Norfloxacin             | 2446                     | 1919                        | 2678                     | 84                                   | 1106061                         | 951778                                 | 388                           | 2385897                                  | 103                            | 1632                                |                   |
|                        | Sulfamethizole          | 2422                     | 1909                        | 2037                     | 110                                  | 1620607                         | 825152                                 | 342                           | 1763154                                  | 86                             | 1535                                |                   |
|                        | Erythromycin            | 1377                     | 1260                        | 1422                     | 170                                  | 2520366                         | 1088100                                | 788                           | 6643380                                  | 137                            | 1590                                |                   |
|                        | Clindamycin             | 2072                     | 1898                        | 2121                     | 163                                  | 2534417                         | 1302779                                | 631                           | 4750055                                  | 116                            | 1848                                |                   |
|                        | Nitrofurantoin          | 1020                     | 869                         | 1195                     | 152                                  | 2244756                         | 542581                                 | 538                           | 3049386                                  | 105                            | 1433                                |                   |
|                        | Trimethoprim            | 1394                     | 1299                        | 1435                     | 157                                  | 2295187                         | 1108038                                | 793                           | 14094187                                 | 131                            | 1418                                |                   |
|                        | Sulfamethoxazole        | 1414                     | 1324                        | 1444                     | 162                                  | 2395637                         | 1193003                                | 848                           | 8186949                                  | 142                            | 1582                                |                   |
|                        | Fucidin                 | 2022                     | 1845                        | 2073                     | 130                                  | 1648020                         | 1425430                                | 706                           | 6186439                                  | 111                            | 2215                                |                   |
|                        | Minocycline             | 330                      | 290                         | 407                      | 3                                    | 24178                           | 227815                                 | 689                           | 3076385                                  | 117                            | 2170                                |                   |
|                        | Furazolidone            | 490                      | 401                         | 563                      | 180                                  | 3273865                         | 802480                                 | 833                           | 4769330                                  | 131                            | 2058                                |                   |
|                        | Tetracycline            | 1436                     | 1327                        | 1467                     | 160                                  | 2423032                         | 1232968                                | 659                           | 5488822                                  | 133                            | 1738                                |                   |
|                        | Rifamycin t             | 209                      | 163                         | 308                      | 160                                  | 2367721                         | 93301                                  | 423                           | 1621508                                  | 117                            | 2342                                |                   |
|                        | Pyrazinamide            | 2320                     | 2106                        | 2400                     | 161                                  | 2502899                         | 1264220                                | 545                           | 4223399                                  | 111                            | 1626                                |                   |
|                        | Isoniazid               | 2765                     | 2439                        | 2639                     | 162                                  | 2369351                         | 1363432                                | 494                           | 4519917                                  | 103                            | 1590                                |                   |
|                        | Ritonavir               | 493                      | 955                         | 991                      | 50                                   | 415463                          | 526018                                 | 614                           | 5309382                                  | 123                            | 1933                                |                   |
|                        | Cyclosporin A           | 634                      | 585                         | 730                      | 84                                   | 771586                          | 658430                                 | 1047                          | 5705996                                  | 130                            | 1897                                |                   |
|                        | Azathioprine            | 1748                     | 1683                        | 1791                     | 157                                  | 2220620                         | 1378220                                | 789                           | 7660229                                  | 139                            | 1623                                |                   |
| Vascular               | Coumarin                | 2458                     | 2187                        | 2534                     | 168                                  | 2434958                         | 1299376                                | 530                           | 4731456                                  | 107                            | 1564                                | 6 out of 7        |
|                        | Acenocoumarol           | 2440                     | 2082                        | 2651                     | 8                                    | 57619                           | 1052405                                | 431                           | 3667359                                  | 102                            | 1580                                |                   |
|                        | Dicumarol               | 2623                     | 1644                        | 3104                     | 4                                    | 80238                           | 1070181                                | 380                           | 1807530                                  | 97                             | 1792                                |                   |
|                        | Warfarin                | 2456                     | 1864                        | 2913                     | 85                                   | 972739                          | 824009                                 | 336                           | 1772833                                  | 89                             | 1519                                |                   |
|                        | Hydralazine             | 2880                     | 2392                        | 3155                     | 143                                  | 2282693                         | 1042054                                | 362                           | 2095651                                  | 92                             | 1641                                |                   |
|                        | Papaverine              | 2067                     | 1505                        | 2400                     | 74                                   | 802943                          | 741022                                 | 361                           | 1922518                                  | 80                             | 2099                                |                   |
|                        | Indapamide              | 2702                     | 2095                        | 2996                     | 136                                  | 1866888                         | 988749                                 | 366                           | 2088726                                  | 91                             | 1606                                |                   |
| Non-Hepatoxic Controls | Meloxicam               | 2214                     | 2121                        | 2295                     | 107                                  | 2066568                         | 1384832                                | 635                           | 5003825                                  | 116                            | 1673                                | 3 out of 32       |
|                        | Penicillin V            | 2430                     | 2192                        | 2525                     | 192                                  | 3292883                         | 1279826                                | 627                           | 4600112                                  | 111                            | 1602                                |                   |
|                        | Metformin               | 2571                     | 2329                        | 2669                     | 169                                  | 2697205                         | 1343990                                | 524                           | 4557312                                  | 111                            | 1636                                |                   |
|                        | Spectinomycin           | 2458                     | 2291                        | 2542                     | 179                                  | 2907052                         | 1344705                                | 551                           | 4148348                                  | 111                            | 1664                                |                   |
|                        | Chlorpheniramine        | 2567                     | 2223                        | 2651                     | 167                                  | 2568107                         | 1257933                                | 491                           | 3694322                                  | 103                            | 1617                                |                   |
|                        | Streptomycin            | 2062                     | 1926                        | 2144                     | 173                                  | 2891274                         | 1267685                                | 650                           | 4118666                                  | 118                            | 1702                                |                   |
|                        | Dexamethasone           | 1733                     | 1663                        | 1768                     | 171                                  | 2772304                         | 1362609                                | 791                           | 4312815                                  | 125                            | 1764                                |                   |
|                        | β-Estradiol             | 1621                     | 1581                        | 1659                     | 132                                  | 1688647                         | 1339764                                | 827                           | 4350235                                  | 132                            | 1741                                |                   |
|                        | DL-Lactic Acid          | 1759                     | 1695                        | 1792                     | 165                                  | 2578668                         | 1342460                                | 763                           | 3918941                                  | 126                            | 1784                                |                   |
|                        | Theophylline            | 2158                     | 1938                        | 2266                     | 169                                  | 2777902                         | 1202146                                | 589                           | 3081721                                  | 117                            | 1769                                |                   |
|                        | Sucrose                 | 1796                     | 1738                        | 1832                     | 167                                  | 2562413                         | 1374869                                | 773                           | 7091152                                  | 122                            | 1800                                |                   |
|                        | Ascorbic acid           | 2062                     | 1954                        | 2112                     | 166                                  | 2450364                         | 1332789                                | 658                           | 5873762                                  | 118                            | 1802                                |                   |
|                        | Biotin                  | 2303                     | 2142                        | 2384                     | 164                                  | 2469347                         | 1330850                                | 580                           | 5437314                                  | 114                            | 1576                                |                   |
|                        | Sorbitol                | 2233                     | 2095                        | 2299                     | 162                                  | 2366249                         | 1360327                                | 605                           | 6906239                                  | 113                            | 1568                                |                   |
|                        | Adipic acid             | 2192                     | 2051                        | 2249                     | 154                                  | 2319751                         | 1323423                                | 605                           | 5509750                                  | 115                            | 1759                                |                   |
|                        | Hexylresorcinol         | 1779                     | 1657                        | 1861                     | 8                                    | 83138                           | 1289309                                | 726                           | 4078109                                  | 129                            | 1672                                |                   |
|                        | Glucosyl-β-lactone      | 1666                     | 1615                        | 1711                     | 147                                  | 2151270                         | 1262000                                | 770                           | 6706004                                  | 128                            | 1567                                |                   |
|                        | Aspartame               | 1600                     | 1454                        | 1627                     | 155                                  | 2257883                         | 1329881                                | 887                           | 8189530                                  | 135                            | 1541                                |                   |
|                        | Benzoic acid            | 1477                     | 1401                        | 1510                     | 150                                  | 2129634                         | 1276707                                | 876                           | 7037355                                  | 138                            | 1610                                |                   |
|                        | Propyl gallate          | 1119                     | 784                         | 1161                     | 125                                  | 1762608                         | 1181734                                | 1074                          | 9519668                                  | 138                            | 1614                                |                   |
|                        | Methylparaben           | 2802                     | 2346                        | 3124                     | 124                                  | 1748488                         | 998156                                 | 355                           | 4041564                                  | 95                             | 1585                                |                   |
|                        | Tartaric acid           | 2719                     | 2254                        | 2978                     | 142                                  | 2012884                         | 1030816                                | 380                           | 5262757                                  | 96                             | 1520                                |                   |
|                        | tert-Butylhydro-quinone | 2187                     | 2011                        | 2751                     | 130                                  | 2093148                         | 743122                                 | 288                           | 4528180                                  | 96                             | 1534                                |                   |
|                        | Natamycin               | 302                      | 274                         | 319                      | 125                                  | 1848005                         | 23821                                  | 109                           | 486358                                   | 90                             | 2530                                |                   |
|                        | Maltol                  | 2721                     | 2028                        | 3075                     | 129                                  | 1904814                         | 931927                                 | 343                           | 1904828                                  | 96                             | 1573                                |                   |
|                        | Xylitol                 | 2699                     | 2149                        | 3148                     | 126                                  | 1771032                         | 843815                                 | 313                           | 8673488                                  | 95                             | 1615                                |                   |
|                        | Citric acid             | 2255                     | 1882                        | 3061                     | 123                                  | 1684524                         | 767952                                 | 250                           | 1147734                                  | 95                             | 1593                                |                   |
|                        | Sorbic acid             | 1759                     | 1434                        | 3040                     | 125                                  | 1745513                         | 703361                                 | 269                           | 618814                                   | 99                             | 1542                                |                   |
|                        | 2-Phenylphenol          | 1883                     | 1450                        | 3019                     | 10                                   | 78741                           | 349574                                 | 186                           | 734311                                   | 97                             | 1568                                |                   |
|                        | D-Leucine               | 1709                     | 1403                        | 2687                     | 112                                  | 1530569                         | 781899                                 | 258                           | 3161777                                  | 105                            | 1564                                |                   |
|                        | Blank                   | 2004                     | 1872                        | 2148                     | 152                                  | 2259713                         | 1093305                                | 544                           | 4197579                                  | 123                            | 1585                                |                   |
|                        | Blank                   | 1200                     | 1098                        | 1237                     | 160                                  | 2441326                         | 1208108                                | 1014                          | 6430395                                  | 151                            | 1645                                |                   |
| Oral hypoglycemics     | Phenformin HCl          | 1791                     | 1084                        | 2357                     | 115                                  | 1611162                         | 608888                                 | 312                           | 308868                                   | 88                             | 2520                                | 2 out of 4        |
|                        | Tolazamide              | 2789                     | 2321                        | 3138                     | 143                                  | 2084276                         | 962331                                 | 349                           | 2975384                                  | 94                             | 1560                                |                   |
|                        | Tolbutamide             | 2730                     | 2150                        | 3027                     | 117                                  | 1706430                         | 1016293                                | 368                           | 2193918                                  | 88                             | 1607                                |                   |
|                        | Thiabenzamide           | 2083                     | 1541                        | 2776                     | 97                                   | 1357967                         | 506057                                 | 286                           | 1421174                                  | 86                             | 1560                                |                   |
| ACE inhibitors         | Lisinopril Dihydrate    | 2381                     | 2217                        | 2461                     | 164                                  | 2574581                         | 1370233                                | 576                           | 6336777                                  | 112                            | 1609                                | 0 out of 7        |
|                        | Losartan potassium      | 2556                     | 2285                        | 2636                     | 168                                  | 2580158                         | 1349178                                | 528                           | 3998267                                  | 105                            | 1644                                |                   |
|                        | Captopril               | 2106                     | 2002                        | 2165                     | 162                                  | 2346807                         | 1326058                                | 630                           | 6284343                                  | 119                            | 1565                                |                   |
|                        | Enalapril               | 2469                     | 2216                        | 2549                     | 155                                  | 2236729                         | 1258858                                | 510                           | 4895643                                  | 109                            | 1712                                |                   |
|                        | Irbesartan              | 1282                     | 1196                        | 1330                     | 110                                  | 1429686                         | 1157463                                | 905                           | 7081555                                  | 145                            | 1637                                |                   |
|                        | Zileuton                | 2014                     | 1875                        | 2054                     | 149                                  | 2088922                         | 1392312                                | 700                           | 8201350                                  | 120                            | 1563                                |                   |
|                        | Propylthiouracil        | 2723                     | 2275                        | 2932                     | 146                                  | 2140422                         | 1092120                                | 401                           | 2355382                                  | 89                             | 1502                                |                   |
| Anti-convulsants       | Dantrolene              | 1699                     | 1613                        | 1738                     | 130                                  | 1317833                         | 1310025                                | 775                           | 4736268                                  | 130                            | 1715                                |                   |
|                        | Valproic acid           | 1859                     | 1774                        | 1890                     | 160                                  | 2461218                         | 1320068                                | 712                           | 3770574                                  | 122                            | 1756                                |                   |
|                        | Chlorzoxazone           | 2418                     | 2128                        | 2493                     | 134                                  | 1811020                         | 1301300                                | 565                           | 4291533                                  | 111                            | 1609                                |                   |
| Other compound classes | Tretinoin               | 2762                     | 1867                        | 2884                     | 4                                    | 47401                           | 1253952                                | 454                           | 2536341                                  | 98                             | 1671                                |                   |
|                        | Isotretinoin            | 2546                     | 2394                        | 2980                     | 41                                   | 436893                          | 823404                                 | 323                           | 1515628                                  | 106                            | 1667                                |                   |
|                        | Pyrimethamine           | 2577                     | 2002                        | 2696                     | 70                                   | 797744                          | 1113616                                | 432                           | 2224737                                  | 88                             | 1496                                |                   |
|                        | Disulfiram              | 2510                     | 1866                        | 2608                     | 46                                   | 608818                          | 919999                                 | 367                           | 1911734                                  | 95                             | 1535                                |                   |
|                        | (s) Kava                | 2008                     | 1901                        | 2051                     | 160                                  | 2385280                         | 1381348                                | 699                           | 6303782                                  | 118                            | 1610                                |                   |
|                        | Methylscitin            | 2156                     | 2046                        | 2212                     | 148                                  | 1982844                         | 1233982                                | 616                           | 6424848                                  | 114                            | 1548                                |                   |
|                        | Dihydromethylscitin     | 2671                     | 2391                        | 2784                     | 164                                  | 2421741                         | 1249065                                | 468                           | 4038922                                  | 103                            | 1607                                |                   |
|                        | Yanogonin               | 1977                     | 1597                        | 2286                     | 127                                  | 1440423                         | 1014378                                | 515                           | 962518                                   | 263                            | 17411                               |                   |
|                        | Desmethoxyxyanogon      | 2127                     | 1888                        | 2205                     | 136                                  | 1850605                         | 1145650                                | 544                           | 2410059                                  | 110                            | 1707                                |                   |
|                        | (+)-Pulegone            | 1963                     | 1840                        | 2010                     | 151                                  | 2285745                         | 1295395                                | 689                           | 5176400                                  | 123                            | 1600                                |                   |
|                        | Scopolamine HBr         | 1421                     | 1095                        | 1479                     | 152                                  | 2168803                         | 871456                                 | 616                           | 5732887                                  | 143                            | 1502                                |                   |
|                        | Salvinorin A            | 857                      | 772                         | 909                      | 147                                  | 2057164                         | 962655                                 | 1158                          | 7525914                                  | 143                            | 1702                                |                   |
|                        | Diethyl 1,4-dihydro-2   | 1650                     | 1616                        | 1683                     | 93                                   | 1037102                         | 1389872                                | 850                           | 5668388                                  | 130                            | 1655                                |                   |
|                        | Forssolin               | 1424                     | 1427                        | 1621                     | 143                                  | 1669967                         | 870054                                 | 608                           | 3290687                                  | 130                            | 2035                                |                   |
|                        | Cholic acid             | 1665                     | 1595                        | 1706                     | 134                                  | 1908047                         | 1296717                                | 780                           | 5287366                                  | 130                            | 1613                                |                   |
|                        | Dibazem HCl             | 1443                     | 1406                        | 1516                     | 148                                  | 2120325                         | 1224170                                | 850                           | 5625680                                  | 129                            | 1659                                |                   |
|                        | Colidine                | 1392                     | 1281                        | 1432                     | 146                                  | 2049719                         | 1188432                                | 853                           | 6045356                                  | 143                            | 1643                                |                   |
|                        | Methotrexate            | 918                      | 825                         | 964                      | 147                                  | 2022974                         | 1075471                                | 1171                          | 6438031                                  | 145                            | 1763                                |                   |
|                        | Gibenciclamide          | 2099                     | 2074                        | 2152                     | 132                                  | 1722468                         | 1283475                                | 612                           | 4811928                                  | 118                            | 1616                                |                   |
|                        | Buspiron HCl            | 2439                     | 2212                        | 2491                     | 163                                  | 2330354                         | 1337064                                | 548                           | 3654355                                  | 111                            | 1778                                |                   |
|                        | Bosentan                | 1958                     | 1921                        | 2073                     | 122                                  | 1625595                         | 1093588                                | 559                           | 3933230                                  | 1                              |                                     |                   |
