# Supplementary material
Source: PubMed Central journal article supplement (PMC3934660)
Supplement: Supp_Table1.pdf [file Supp_Table1.pdf]

**Supplementary Table S1. Output Parameter Values for Live Cell Multiparametric Hepatotoxicity Assay**

| Output parameter                                       | Concentration (μM) | n (control) | n (compound) | Average ± SD (max) | Average ± SD (min) | Z'-Factor | Assay window |
|--------------------------------------------------------|--------------------|-------------|--------------|--------------------|--------------------|-----------|--------------|
| Positive W2 (number of Calcein AM-positive cells)      |                    |             |              |                    |                    |           |              |
| Phenylbutasone                                         | 100                | 8           | 8            | 2,056 ± 76         | 147 ± 57           | 0.79      | 14.0         |
| Staurosporine                                          | 10                 | 8           | 8            | 1,812 ± 125        | 138 ± 118          | 0.56      | 13.1         |
| Doxorubicin                                            | 10                 | 8           | 8            | 1,828 ± 157        | 10 ± 11            | 0.72      | 189.1        |
| Pimozide <sup>a</sup>                                  | 100                | 20          | 8            | 2,750 ± 413        | 23 ± 13            | 0.53      | 119.6        |
| Chloroquine <sup>a</sup>                               | 100                | 20          | 8            | 2,750 ± 413        | 34 ± 15            | 0.53      | 82.1         |
| Seneciophylline <sup>a</sup>                           | 100                | 20          | 8            | 2,750 ± 413        | 243 ± 62           | 0.43      | 11.3         |
| rac perhexiline maleate <sup>a</sup>                   | 100                | 20          | 4            | 2,750 ± 413        | 1.3 ± 1.9          | 0.55      | 2,199.8      |
| Tamoxifen <sup>a</sup>                                 | 100                | 20          | 4            | 2,750 ± 413        | 6.8 ± 5.9          | 0.54      | 407.4        |
| Promethazine · HCl <sup>a</sup>                        | 100                | 20          | 4            | 2,750 ± 413        | 15.5 ± 13.5        | 0.53      | 177.4        |
| % Positive W2 (% of Calcein AM-positive cells)         |                    |             |              |                    |                    |           |              |
| Phenylbutasone                                         | 100                | 8           | 8            | 98 ± 0.3           | 91.6 ± 2.6         | -0.28     | 1.1          |
| Staurosporine                                          | 10                 | 8           | 8            | 99 ± 0.4           | 49.9 ± 6.5         | 0.57      | 2.0          |
| Doxorubicin                                            | 10                 | 8           | 8            | 98 ± 0.8           | 59.4 ± 34.5        | -1.72     | 1.7          |
| Pimozide                                               | 100                | 20          | 8            | 93 ± 3.3           | 6.1 ± 4.9          | 0.71      | 15.2         |
| Chloroquine                                            | 100                | 20          | 8            | 93 ± 3.4           | 29.6 ± 13.4        | 0.21      | 3.1          |
| Seneciophylline                                        | 100                | 20          | 8            | 93 ± 3.4           | 82.9 ± 7.5         | -2.20     | 1.1          |
| rac perhexiline maleate                                | 100                | 20          | 4            | 93 ± 3.4           | 0.2 ± 0.4          | 0.88      | 390.4        |
| Tamoxifen                                              | 100                | 20          | 4            | 93 ± 3.4           | 0.9 ± 0.8          | 0.86      | 103.8        |
| Promethazine · HCl                                     | 100                | 20          | 4            | 93 ± 3.4           | 41.6 ± 6.3         | 0.43      | 2.2          |
| Positive W3 (number of cells with intact mitochondria) |                    |             |              |                    |                    |           |              |
| Phenylbutasone                                         | 100                | 8           | 8            | 1,778 ± 34         | 93 ± 22            | 0.90      | 19.2         |
| Staurosporine                                          | 10                 | 8           | 8            | 1,588 ± 96         | 50 ± 73            | 0.67      | 31.6         |
| Doxorubicin                                            | 10                 | 8           | 8            | 1,623 ± 130        | 12 ± 11            | 0.74      | 131.6        |
| Pimozide                                               | 100                | 20          | 8            | 1,191 ± 147        | 56 ± 77            | 0.41      | 20.0         |
| Chloroquine                                            | 100                | 20          | 8            | 1,191 ± 147        | 0.3 ± 0.5          | 0.63      | 4,765.6      |
| Seneciophylline                                        | 100                | 20          | 8            | 1,191 ± 147        | 171 ± 45           | 0.43      | 7.0          |
| rac perhexiline maleate                                | 100                | 20          | 4            | 1,191 ± 147        | 0.3 ± 0.5          | 0.63      | 4,765.6      |
| Tamoxifen                                              | 100                | 20          | 4            | 1,191 ± 147        | 0.8 ± 0.5          | 0.63      | 1,588.5      |
| Promethazine · HCl                                     | 100                | 20          | 4            | 1,191 ± 147        | 0.3 ± 0.5          | 0.63      | 4,765.6      |

*(continued)*

Supplementary Table S1. (Continued)

| Output parameter                             | Concentration (μM) | n (control) | n (compound) | Average ± SD (max)      | Average ± SD (min)        | Z'-Factor | Assay window |
|----------------------------------------------|--------------------|-------------|--------------|-------------------------|---------------------------|-----------|--------------|
| Total cells                                  |                    |             |              |                         |                           |           |              |
| Phenylbutasone                               | 100                | 8           | 8            | 2,095 ± 81              | 161 ± 61                  | 0.78      | 13.1         |
| Staurosporine                                | 10                 | 8           | 8            | 1,838 ± 128             | 191 ± 105                 | 0.58      | 9.6          |
| Doxorubicin                                  | 10                 | 8           | 8            | 1,857 ± 152             | 13 ± 11                   | 0.73      | 142.8        |
| Pimozide                                     | 100                | 20          | 8            | 2,987 ± 446             | 660 ± 180                 | 0.19      | 4.5          |
| Chloroquine                                  | 100                | 20          | 8            | 2,987 ± 446             | 117 ± 22                  | 0.51      | 25.6         |
| Seneciophylline                              | 100                | 20          | 8            | 2,987 ± 446             | 290 ± 55                  | 0.44      | 10.3         |
| rac perhexiline maleate                      | 100                | 20          | 4            | 2,987 ± 446             | 722 ± 230                 | 0.11      | 4.1          |
| Tamoxifen                                    | 100                | 20          | 4            | 2,987 ± 446             | 731 ± 211                 | 0.13      | 4.1          |
| Promethazine · HCl                           | 100                | 20          | 4            | 2,987 ± 446             | 48 ± 25                   | 0.52      | 61.9         |
| Positive W2 mean stain area (cell spreading) |                    |             |              |                         |                           |           |              |
| Phenylbutasone                               | 100                | 8           | 8            | 910 ± 47                | 246 ± 24                  | 0.68      | 3.7          |
| Staurosporine                                | 10                 | 8           | 8            | 997 ± 72                | 185 ± 13                  | 0.69      | 5.4          |
| Doxorubicin                                  | 10                 | 8           | 8            | 910 ± 90                | 1,042 ± 1,487             | -5.74     | 0.9          |
| Pimozide                                     | 100                | 20          | 8            | 548 ± 94                | 172 ± 15                  | 0.13      | 3.1          |
| Chloroquine                                  | 100                | 20          | 8            | 548 ± 94                | 243 ± 18                  | -0.10     | 2.3          |
| Seneciophylline                              | 100                | 20          | 8            | 548 ± 94                | 1,560 ± 138               | 0.31      | 2.8          |
| rac perhexiline maleate                      | 100                | 20          | 4            | 548 ± 94                | 80 ± 92                   | -0.19     | 6.9          |
| Tamoxifen                                    | 100                | 20          | 4            | 548 ± 94                | 111 ± 75                  | -0.16     | 4.9          |
| Promethazine · HCl                           | 100                | 20          | 4            | 548 ± 94                | 304 ± 46                  | -0.72     | 1.8          |
| Positive W2 mean stain integrated intensity  |                    |             |              |                         |                           |           |              |
| Phenylbutasone                               | 100                | 8           | 8            | 74,216,160 ± 8,587,114  | 8,055,733 ± 1,027,195     | 0.56      | 9.2          |
| Staurosporine                                | 10                 | 8           | 8            | 70,186,701 ± 12,035,372 | 5,121,566 ± 486,415       | 0.42      | 13.7         |
| Doxorubicin                                  | 10                 | 8           | 8            | 57,453,660 ± 14,452,184 | 256,376,639 ± 477,143,244 | -6.41     | 0.2          |
| Pimozide                                     | 100                | 20          | 8            | 7,974,532 ± 1,601,910   | 1,513,469 ± 227,804       | 0.15      | 5.3          |
| Chloroquine                                  | 100                | 20          | 8            | 7,974,532 ± 1,601,910   | 2,522,166 ± 902,099       | -0.38     | 3.2          |
| Seneciophylline                              | 100                | 20          | 8            | 7,974,532 ± 1,601,910   | 54,458,219 ± 6,225,276    | 0.49      | 6.8          |
| rac perhexiline maleate                      | 100                | 20          | 4            | 7,974,532 ± 1,601,910   | 702,935 ± 907,532         | -0.04     | 11.3         |
| Tamoxifen                                    | 100                | 20          | 4            | 7,974,532 ± 1,601,910   | 835,341 ± 619,332         | 0.07      | 9.5          |
| Promethazine · HCl                           | 100                | 20          | 4            | 7,974,532 ± 1,601,910   | 5,477,076 ± 974,086       | -2.09     | 1.5          |

(continued)

**Supplementary Table S1. (Continued)**

| Output parameter                         | Concentration (μM) | n (control) | n (compound) | Average ± SD (max) | Average ± SD (min) | Z'-Factor | Assay window |
|------------------------------------------|--------------------|-------------|--------------|--------------------|--------------------|-----------|--------------|
| Positive W2 mean stain average intensity |                    |             |              |                    |                    |           |              |
| Phenylbutasone                           | 100                | 8           | 8            | 35,024 ± 2,727     | 13,852 ± 1,191     | 0.44      | 2.5          |
| Staurosporine                            | 10                 | 8           | 8            | 29,660 ± 3,933     | 11,790 ± 1,651     | 0.06      | 2.5          |
| Doxorubicin                              | 10                 | 8           | 8            | 26,514 ± 4,858     | 10,964 ± 6,046     | -1.10     | 2.4          |
| Pimozide                                 | 100                | 20          | 8            | 6,126 ± 357        | 3,688 ± 371        | 0.10      | 1.7          |
| Chloroquine                              | 100                | 20          | 8            | 6,126 ± 357        | 4,333 ± 1,205      | -1.61     | 1.4          |
| Seneciophylline                          | 100                | 20          | 8            | 6,126 ± 357        | 14,980 ± 308       | 0.77      | 2.4          |
| rac perhexiline maleate                  | 100                | 20          | 4            | 6,126 ± 357        | 1,847 ± 2,365      | -0.91     | 3.3          |
| Tamoxifen                                | 100                | 20          | 4            | 6,126 ± 357        | 2,353 ± 1,656      | -0.60     | 2.6          |
| Promethazine · HCl                       | 100                | 20          | 4            | 6,126 ± 357        | 7,640 ± 1,247      | -2.18     | 1.2          |
| Positive W3 mean stain area              |                    |             |              |                    |                    |           |              |
| Phenylbutasone                           | 100                | 8           | 8            | 531 ± 41           | 196 ± 32           | 0.34      | 2.7          |
| Staurosporine                            | 10                 | 8           | 8            | 607 ± 46           | 167 ± 25           | 0.52      | 3.6          |
| Doxorubicin                              | 10                 | 8           | 8            | 518 ± 66           | 94,943 ± 109,469   | -2.48     | 0.0          |
| Pimozide                                 | 100                | 20          | 8            | 233 ± 32           | 333 ± 169          | 0.69      | 6.9          |
| Chloroquine                              | 100                | 20          | 8            | 233 ± 32           | 42 ± 84            | -0.82     | 5.6          |
| Seneciophylline                          | 100                | 20          | 8            | 233 ± 32           | 464 ± 24           | 0.27      | 2.0          |
| rac perhexiline maleate                  | 100                | 20          | 4            | 233 ± 32           | 31 ± 62            | -0.40     | 7.5          |
| Tamoxifen                                | 100                | 20          | 4            | 233 ± 32           | 112 ± 84           | -1.87     | 2.1          |
| Promethazine · HCl                       | 100                | 20          | 4            | 233 ± 32           | 0.3 ± 0.5          | 0.58      | 932.3        |
| All nuclei mean area (W1)                |                    |             |              |                    |                    |           |              |
| Phenylbutasone                           | 100                | 8           | 8            | 121 ± 2            | 93 ± 4             | 0.28      | 1.3          |
| Staurosporine                            | 10                 | 8           | 8            | 142 ± 6            | 85 ± 4             | 0.46      | 1.7          |
| Doxorubicin                              | 10                 | 8           | 8            | 132 ± 6            | 161 ± 207          | -21.77    | 0.8          |
| Pimozide                                 | 100                | 20          | 8            | 121 ± 8            | 113 ± 5            | -18.00    | 1.1          |
| Chloroquine                              | 100                | 20          | 8            | 121 ± 8            | 110 ± 16           | -5.39     | 1.1          |
| Seneciophylline                          | 100                | 20          | 8            | 121 ± 8            | 146 ± 7            | -0.84     | 1.2          |
| rac perhexiline maleate                  | 100                | 20          | 4            | 121 ± 8            | 105 ± 7            | -1.85     | 1.2          |
| Tamoxifen                                | 100                | 20          | 4            | 121 ± 8            | 90 ± 13            | -0.94     | 1.4          |
| Promethazine · HCl                       | 100                | 20          | 4            | 121 ± 8            | 106 ± 6            | -1.84     | 1.1          |

*(continued)*

**Supplementary Table S1. (Continued)**

| Output parameter                       | Concentration ( $\mu\text{M}$ ) | <i>n</i> (control) | <i>n</i> (compound) | Average $\pm$ SD (max) | Average $\pm$ SD (min) | Z'-Factor | Assay window |
|----------------------------------------|---------------------------------|--------------------|---------------------|------------------------|------------------------|-----------|--------------|
| All nuclei mean average intensity (W1) |                                 |                    |                     |                        |                        |           |              |
| Phenylbutasone                         | 100                             | 8                  | 8                   | 970 $\pm$ 26           | 1,494 $\pm$ 49         | 0.57      | 1.5          |
| Staurosporine                          | 10                              | 8                  | 8                   | 828 $\pm$ 27           | 1,278 $\pm$ 105        | 0.12      | 1.5          |
| Doxorubicin                            | 10                              | 8                  | 8                   | 800 $\pm$ 41           | 978 $\pm$ 1,441        | -23.98    | 1.2          |
| Pimozide                               | 100                             | 20                 | 8                   | 10,460 $\pm$ 1,138     | 15,206 $\pm$ 5,107     | -2.90     | 1.5          |
| Chloroquine                            | 100                             | 20                 | 8                   | 10,460 $\pm$ 1,139     | 6,422 $\pm$ 977        | -0.57     | 1.6          |
| Seneciophylline                        | 100                             | 20                 | 8                   | 10,460 $\pm$ 1,139     | 6,207 $\pm$ 170        | 0.08      | 1.7          |
| rac perhexiline maleate                | 100                             | 20                 | 4                   | 10,460 $\pm$ 1,139     | 12,421 $\pm$ 912       | -2.14     | 1.2          |
| Tamoxifen                              | 100                             | 20                 | 4                   | 10,460 $\pm$ 1,139     | 11,859 $\pm$ 1,046     | -3.69     | 1.1          |
| Promethazine · HCl                     | 100                             | 20                 | 4                   | 10,460 $\pm$ 1,139     | 9,357 $\pm$ 745        | -4.13     | 1.1          |

Images acquired with 10x objective. Data combined from 2 separate experiments. W1 = Hoechst; W2 = Calcein AM; W3 = MitoTracker Orange.

<sup>20</sup> common control wells were used for these six compounds.

SD, standard deviation.
