# Supplementary material
Source: PubMed Central journal article supplement (PMC3934660)
Supplement: Supp_Table2.pdf [file Supp_Table2.pdf]

**Supplementary Table S2. Output Parameter Values for Cytoskeleton Integrity Hepatotoxicity Assay**

| Output parameter                            | Concentration (μM) | n | Average ± SD (max)  | Average ± SD (min)     | Z'-Factor | Assay window |
|---------------------------------------------|--------------------|---|---------------------|------------------------|-----------|--------------|
| Positive W2                                 |                    |   |                     |                        |           |              |
| Aflatoxin B1                                | 30                 | 8 | 3,676 ± 194         | 77 ± 11                | 0.83      | 48.1         |
| Aflatoxin G1                                | 30                 | 8 | 3,569 ± 166         | 108 ± 33               | 0.83      | 33.1         |
| Staurosporine                               | 3                  | 8 | 3,708 ± 103         | 624 ± 225              | 0.68      | 5.9          |
| Mitomycin C                                 | 30                 | 8 | 3,626 ± 170         | 312 ± 298              | 0.58      | 11.6         |
| Doxorubicin                                 | 10                 | 8 | 3,447 ± 223         | 8 ± 17                 | 0.79      | 452.0        |
| % Positive W2                               |                    |   |                     |                        |           |              |
| Aflatoxin B1                                | 30                 | 8 | 77 ± 2              | 6 ± 1                  | 0.86      | 12.9         |
| Aflatoxin G1                                | 30                 | 8 | 75 ± 1              | 6 ± 2                  | 0.87      | 12.2         |
| Staurosporine                               | 3                  | 8 | 78 ± 1              | 18 ± 7                 | 0.60      | 4.3          |
| Mitomycin C                                 | 30                 | 8 | 75 ± 2              | 9 ± 8                  | 0.58      | 8.5          |
| Doxorubicin                                 | 10                 | 8 | 76 ± 2              | 25 ± 46                | -1.79     | 3.1          |
| Total cells                                 |                    |   |                     |                        |           |              |
| Aflatoxin B1                                | 30                 | 8 | 4,796 ± 260         | 1,319 ± 220            | 0.59      | 3.6          |
| Aflatoxin G1                                | 30                 | 8 | 4,731 ± 207         | 1,739 ± 226            | 0.57      | 2.7          |
| Staurosporine                               | 3                  | 8 | 4,764 ± 118         | 3,479 ± 115            | 0.46      | 1.4          |
| Mitomycin C                                 | 30                 | 8 | 4,829 ± 248         | 2,996 ± 751            | -0.64     | 1.6          |
| Doxorubicin                                 | 10                 | 8 | 4,542 ± 245         | 8 ± 17                 | 0.83      | 586.1        |
| Positive W2 mean stain area                 |                    |   |                     |                        |           |              |
| Aflatoxin B1                                | 30                 | 8 | 381 ± 19            | 292 ± 25               | -0.47     | 1.3          |
| Aflatoxin G1                                | 30                 | 8 | 384 ± 19            | 267 ± 19               | 0.03      | 1.4          |
| Staurosporine                               | 3                  | 8 | 367 ± 13            | 268 ± 39               | -0.58     | 1.4          |
| Mitomycin C                                 | 30                 | 8 | 379 ± 21            | 153 ± 5                | 0.66      | 2.5          |
| Doxorubicin                                 | 10                 | 8 | 380 ± 14            | 2,147 ± 4,029          | -5.86     | 0.2          |
| Positive W2 mean stain integrated intensity |                    |   |                     |                        |           |              |
| Aflatoxin B1                                | 30                 | 8 | 1,278,424 ± 93,668  | 442,620 ± 32,993       | 0.55      | 2.9          |
| Aflatoxin G1                                | 30                 | 8 | 1,202,916 ± 91,737  | 431,319 ± 31,497       | 0.52      | 2.8          |
| Staurosporine                               | 3                  | 8 | 1,173,527 ± 110,292 | 503,129 ± 78,634       | 0.15      | 2.3          |
| Mitomycin C                                 | 30                 | 8 | 1,206,085 ± 100,744 | 231,783 ± 10,728       | 0.66      | 5.2          |
| Doxorubicin                                 | 10                 | 8 | 1,170,052 ± 72,089  | 8,371,646 ± 15,837,137 | -5.63     | 0.1          |

*(continued)*

**Supplementary Table S2. (Continued)**

| Output parameter                          | Concentration (μM) | <i>n</i> | Average ± SD (max) | Average ± SD (min) | Z'-Factor | Assay window |
|-------------------------------------------|--------------------|----------|--------------------|--------------------|-----------|--------------|
| Positive W2 mean stain average intensity  |                    |          |                    |                    |           |              |
| Aflatoxin B1                              | 30                 | 8        | 5,676 ± 434        | 2,561 ± 92         | 0.49      | 2.2          |
| Aflatoxin G1                              | 30                 | 8        | 5,301 ± 318        | 2,733 ± 74         | 0.54      | 1.9          |
| Staurosporine                             | 3                  | 8        | 5,395 ± 403        | 3,166 ± 73         | 0.36      | 1.7          |
| Mitomycin C                               | 30                 | 8        | 5,385 ± 365        | 2,564 ± 71         | 0.54      | 2.1          |
| Doxorubicin                               | 10                 | 8        | 5,213 ± 305        | 1,639 ± 3,037      | -1.81     | 3.2          |
| All nuclei mean area (W1)                 |                    |          |                    |                    |           |              |
| Aflatoxin B1                              | 30                 | 8        | 77 ± 1             | 47 ± 1             | 0.77      | 1.7          |
| Aflatoxin G1                              | 30                 | 8        | 77 ± 1             | 47 ± 1             | 0.78      | 1.6          |
| Staurosporine                             | 3                  | 8        | 81 ± 1             | 44 ± 3             | 0.65      | 1.8          |
| Mitomycin C                               | 30                 | 8        | 76 ± 1             | 57 ± 2             | 0.62      | 1.3          |
| Doxorubicin                               | 10                 | 8        | 73 ± 3             | 9 ± 16             | 0.10      | 8.3          |
| All nuclei mean integrated intensity (W1) |                    |          |                    |                    |           |              |
| Aflatoxin B1                              | 30                 | 8        | 168,871 ± 5,151    | 98,355 ± 7,440     | 0.46      | 1.7          |
| Aflatoxin G1                              | 30                 | 8        | 167,729 ± 6,721    | 113,339 ± 3,869    | 0.42      | 1.5          |
| Staurosporine                             | 3                  | 8        | 174,230 ± 6,485    | 106,881 ± 3,279    | 0.57      | 1.6          |
| Mitomycin C                               | 30                 | 8        | 161,457 ± 13,785   | 129,901 ± 13,946   | -1.64     | 1.2          |
| Doxorubicin                               | 10                 | 8        | 101,617 ± 17,929   | 7,704 ± 14,438     | -0.03     | 13.2         |

Images acquired with 10× objective. W1 = Hoechst; W2 = AF488-Phalloidin.
