# Supplementary material
Source: PubMed Central journal article supplement (PMC3934660)
Supplement: Supp_Table3.pdf [file Supp_Table3.pdf]

**Supplementary Table S3. Multi-Parameter Toxicity Assay, Kinetics**

| Calcein AM-positive cells | IC <sub>50</sub> (mM) |        |        |
|---------------------------|-----------------------|--------|--------|
|                           | 1 day                 | 3 days | 7 days |
| Amiodarone                | 25.2                  | 10.5   | 10     |
| Tamoxifen                 | 8.9                   | 29     | 5.6    |
| Pimozide                  | 32.2                  | 32     | 14     |
| Mitomycin C               | > 100                 | 11     | 8.2    |
| Idarubicin                | 7                     | 2      | 1.5    |
| Haloperidol               | no tox                | 37     | 10.8   |

*n* = 4.
