# Supplementary material
Source: PubMed Central journal article supplement (PMC3934660)
Supplement: Supp_Table4.pdf [file Supp_Table4.pdf]

**Supplementary Table S4. Output Parameter Values for JC-10 Mitochondria Potential Assay**

| Compound                          | Concentration (nM) | <i>n</i> | Average ± SD (max) | Average ± SD (min) | Z'-Factor | Assay window |
|-----------------------------------|--------------------|----------|--------------------|--------------------|-----------|--------------|
| Antimycin A 50 nM                 |                    |          |                    |                    |           |              |
| Granularity                       | 50                 | 8        | 43,616 ± 3,081     | 1,408 ± 1,160      | 0.70      | 31           |
| Granules per cell                 |                    |          | 24 ± 2.1           | 0.8 ± 0.7          | 0.64      | 30           |
| Total granule area                |                    |          | 436,463 ± 92,337   | 5,426 ± 4,752      | 0.32      | 80           |
| Mean granule area                 |                    |          | 236 ± 32           | 3.1 ± 2.7          | 0.55      | 76           |
| Cell total granule area           |                    |          | 222 ± 28           | 3.0 ± 2.6          | 0.58      | 75           |
| CCCP 500 nM                       |                    |          |                    |                    |           |              |
| Granularity                       | 500                | 4        | 44,170 ± 1,680     | 1,494 ± 461        | 0.85      | 30           |
| Granules per cell                 |                    |          | 23 ± 1.3           | 0.8 ± 0.3          | 0.79      | 29           |
| Total granule area                |                    |          | 473,126 ± 36,030   | 5,272 ± 1,296      | 0.76      | 90           |
| Mean granule area                 |                    |          | 247 ± 18           | 2.8 ± 0.7          | 0.77      | 87           |
| Cell total granule area           |                    |          | 231 ± 16           | 2.8 ± 0.7          | 0.78      | 83           |
| 10x objective, 60 min incubation. |                    |          |                    |                    |           |              |
