# Supplementary material
Source: PubMed Central journal article supplement (PMC3934660)
Supplement: Supp_Table5.pdf [file Supp_Table5.pdf]

**Supplementary Table S5. Time Course Studied for JC-10 Mitochondria Potential Assay**

| Time (min)                                                                    | Average $\pm$ SD (max) | Average $\pm$ SD (min) | Z'-Factor | Assay window |
|-------------------------------------------------------------------------------|------------------------|------------------------|-----------|--------------|
| Variation of granularity output with CCCP incubation time (0.8 mM, $n = 12$ ) |                        |                        |           |              |
| 60                                                                            | 6,946 $\pm$ 166.2      | 18.0 $\pm$ 16.1        | 0.92      | 386          |
| 90                                                                            | 4,922 $\pm$ 22.6       | 18.0 $\pm$ 10.0        | 0.98      | 273          |
| 120                                                                           | 2,008 $\pm$ 70.0       | 0.7 $\pm$ 0.6          | 0.89      | 3,011        |
