# Supplementary material
Source: PubMed Central journal article supplement (PMC3934660)
Supplement: Supp_Table6.pdf [file Supp_Table6.pdf]

**Supplementary Table S6. Variation of IC<sub>50</sub> Values with Incubation Time**

| Compound    | IC <sub>50</sub> (nM) |        |         |
|-------------|-----------------------|--------|---------|
|             | 60 min                | 90 min | 120 min |
| Antimycin A | 46.9                  | 5.4    | 4.5     |
| Valinomycin | 0.084                 | 0.049  | 0.035   |
| CCCP        | 147.9                 | 45.3   | 41.4    |

*n* = 3 for all compounds.
