# Supplementary material
Source: PubMed Central journal article supplement (PMC3934660)
Supplement: Supp_Table7.pdf [file Supp_Table7.pdf]

**Supplementary Table S7. Granule Output Parameter Results for Autophagy Assay**

| Compound     | Concentration (nM) | <i>n</i> | Average ± SD (max)        | Average ± SD (min)          | Z-Factor | Assay window |
|--------------|--------------------|----------|---------------------------|-----------------------------|----------|--------------|
| Carboplatin  | 3                  | 4        | 114,584,792 ± 46,958,380  | 493,023,728 ± 198,197,551   | -0.9     | 4.3          |
| Cytarabine   | 30                 | 4        | 354,623,272 ± 105,845,456 | 1,194,824,432 ± 552,598,423 | -1.4     | 3.4          |
| Cyclosporine | 3                  | 4        | 133,326,914 ± 51,350,221  | 281,332,203 ± 140,459,401   | -2.9     | 2.1          |
