# Supplementary material
Source: PubMed Central journal article supplement (PMC3934660)
Supplement: Supp_Table8.pdf [file Supp_Table8.pdf]

| Supplementary Table S8. Granule Output Parameter Results for Phospholipidosis Assay |                    |          |                    |                    |          |              |
|-------------------------------------------------------------------------------------|--------------------|----------|--------------------|--------------------|----------|--------------|
| Compound                                                                            | Concentration (nM) | <i>n</i> | Average ± SD (max) | Average ± SD (min) | Z-Factor | Assay window |
| Amiodarone                                                                          | 10                 | 12       | 12,696 ± 2,803     | 30,000 ± 15,867    | -2.24    | 2.4          |
| Cyclosporin A                                                                       | 30                 | 12       | 12,696 ± 2,803     | 25,614 ± 4,435     | -0.68    | 2.0          |
| Propranolol                                                                         | 30                 | 12       | 12,696 ± 2,803     | 56,854 ± 5,596     | 0.43     | 4.5          |
